# Supplementary material
Source: MDPI journal article supplement (https://www.mdpi.com/2410-3888/8/6/303)

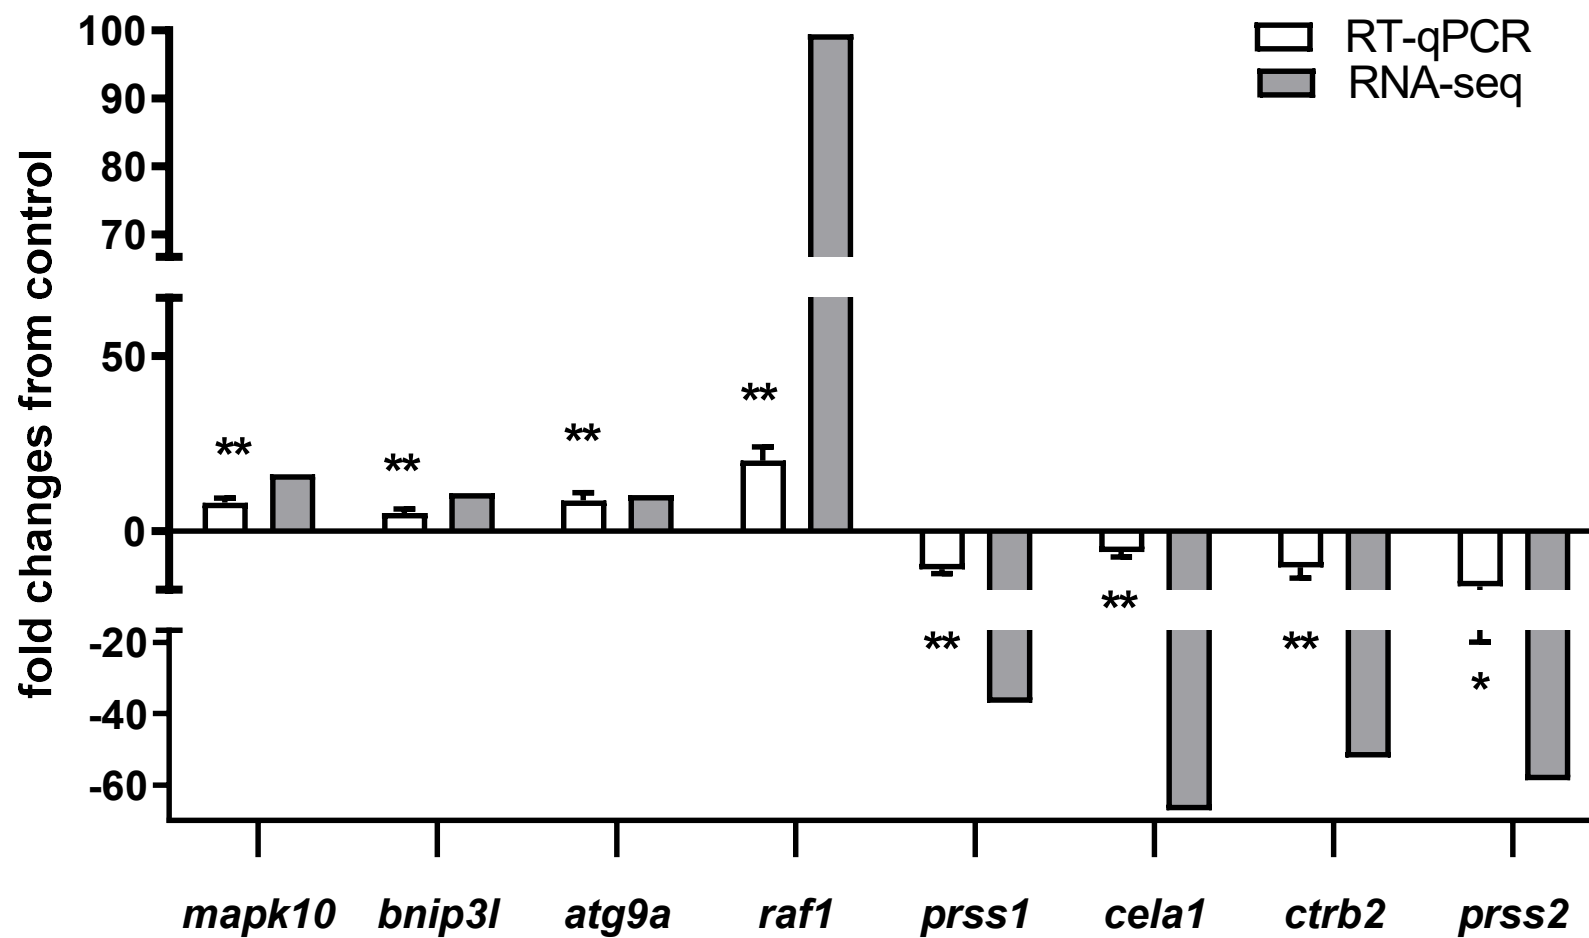

Supplement: s1 [file s1]

Principal component scatter plot

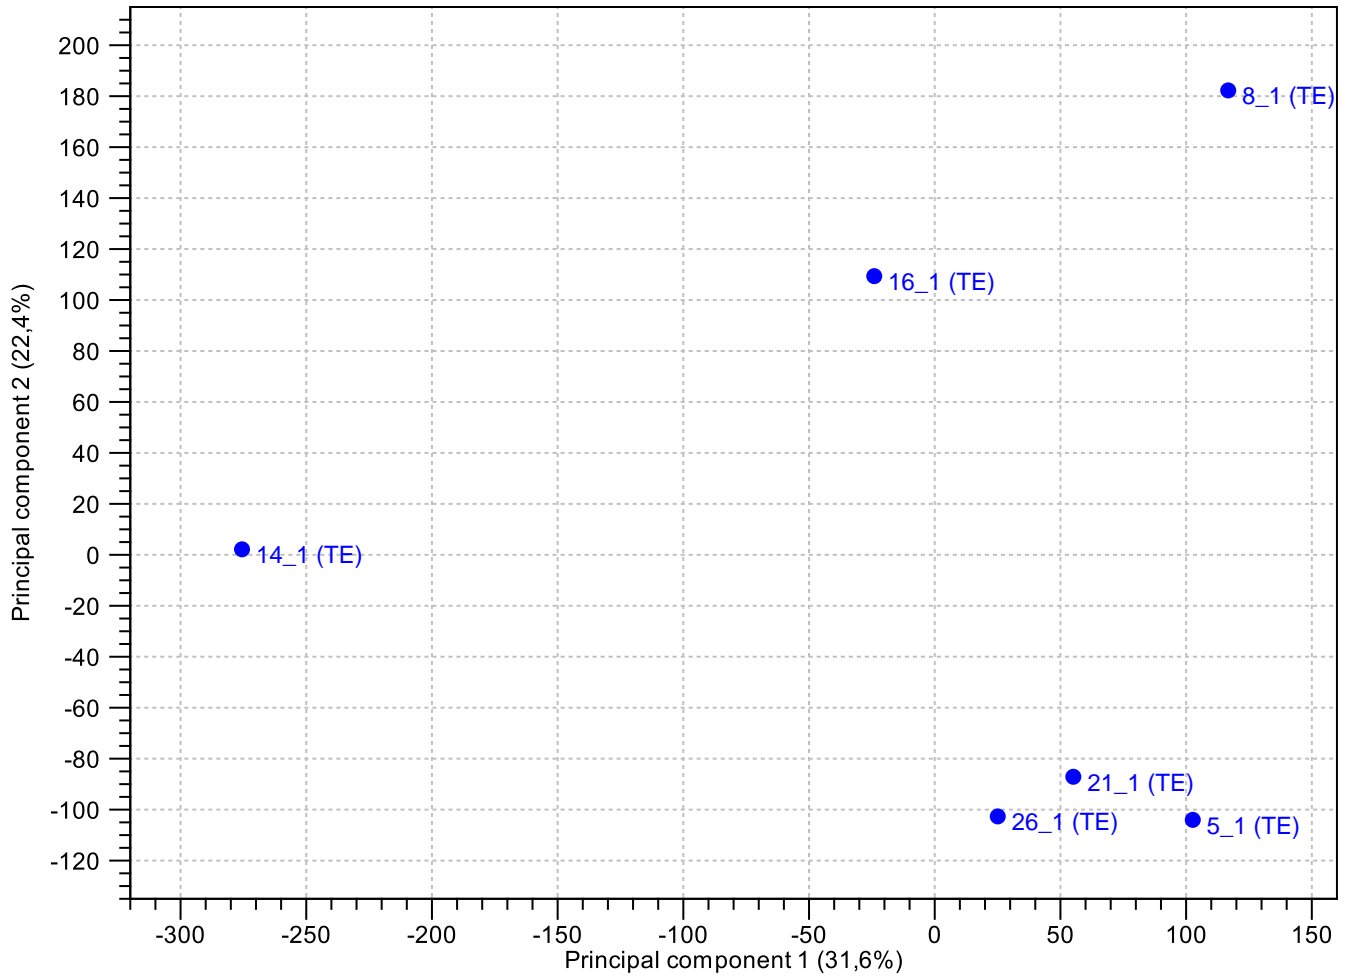

Supplement: s1 [file s1]
